# Supplementary material for: Clinical Characteristics and Outcome of Patients with Infective Endocarditis Diagnosed in a Department of Internal Medicine
Source: J Clin Med. 2020 Mar 21;9(3):864. doi: 10.3390/jcm9030864 (PMC7141516; doi:10.3390/jcm9030864)
Supplement: Supplementary file 1 [file jcm-09-00864-s001.pdf]

# Supplementary Materials: Clinical Characteristics and Outcome of Patients with Infective Endocarditis Diagnosed in a Department of Internal Medicine

Louis Kreitmann, David Montaigne, David Launay, Sandrine Morell-Dubois, Hélène Maillard, Marc Lambert, Eric Hachulla and Vincent Sobanski

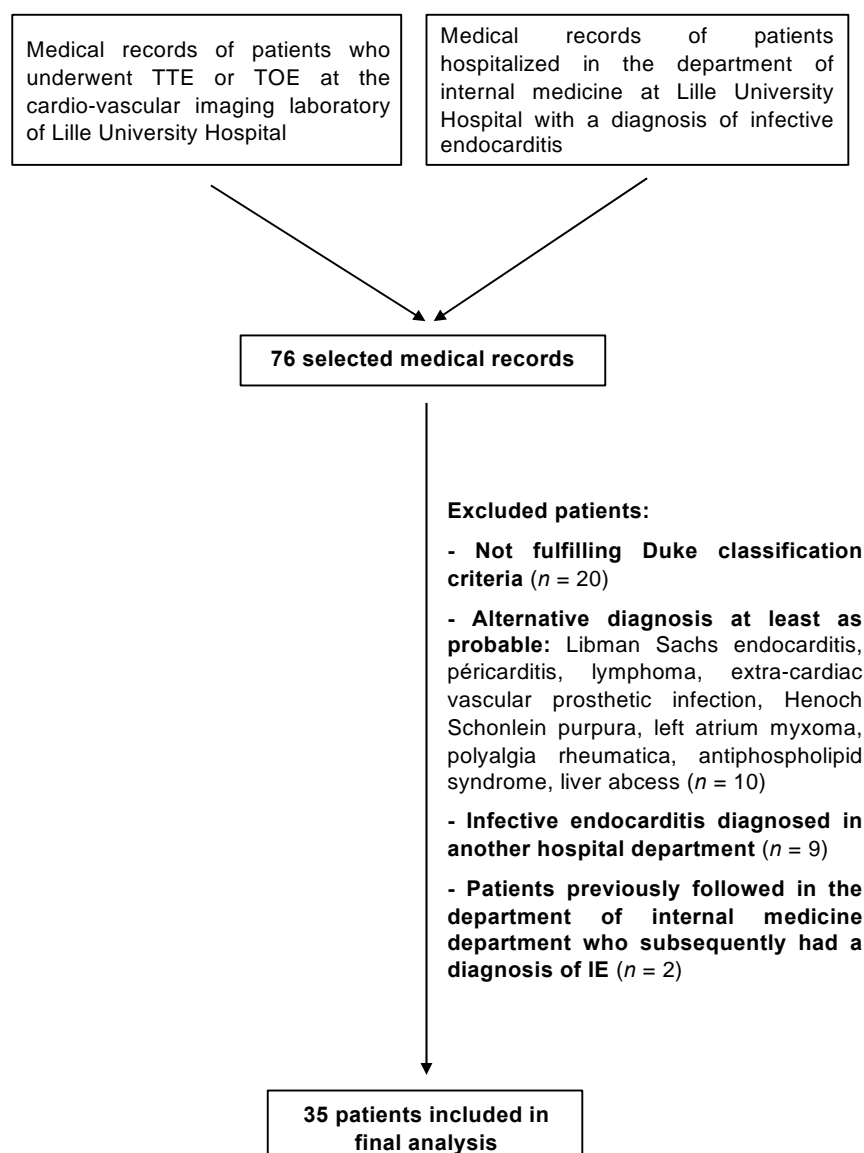

Figure S1. Flow-chart of the study.

**Table S1.** Selected biological parameters at IE diagnosis.

| Parameters                                 | Patients tested | Patients affected |
|--------------------------------------------|-----------------|-------------------|
| C-reactive protein (mg/L), median (IQR)    | 34              | 71 (46–144)       |
| Ferritin (µg/L, g/L), median (IQR)         | 18              | 324 (165–642)     |
| Rheumatoid factors, <i>n</i> (%)           | 14              | 7 (50.0%)         |
| Cryoglobulinemia, <i>n</i> (%)             | 22              | 11 (50.0%)        |
| Hypocomplementemia, <i>n</i> (%)           | 19              | 5 (26.3%)         |
| ANCA, <i>n</i> (%)                         | 20              | 1 (5.0%)          |
| Anti-nuclear antibodies, <i>n</i> (%)      | 19              | 8 (42.1%)         |
| Circulating immune complexes, <i>n</i> (%) | 15              | 5 (33.3%)         |
| Antiphospholipid antibodies, <i>n</i> (%)  | 14              | 3 (21.4%)         |

ANCA: antineutrophil cytoplasmic antibodies. Of note, the patient with positive ANCA had positive immunofluorescence but negative enzyme-linked immunoassay for both PR proteinase 3 (PR3) and myeloperoxidase (MPO).
